# Supplementary material for: Biochemical Activities and Genetic Functions of the Drosophila melanogaster Fancm Helicase in DNA Repair
Source: Oxford University Press journal article supplement (doi:10.1534/genetics.116.192534), 2016-07-28
Supplement: figures1.pdf [file figures1.pdf]

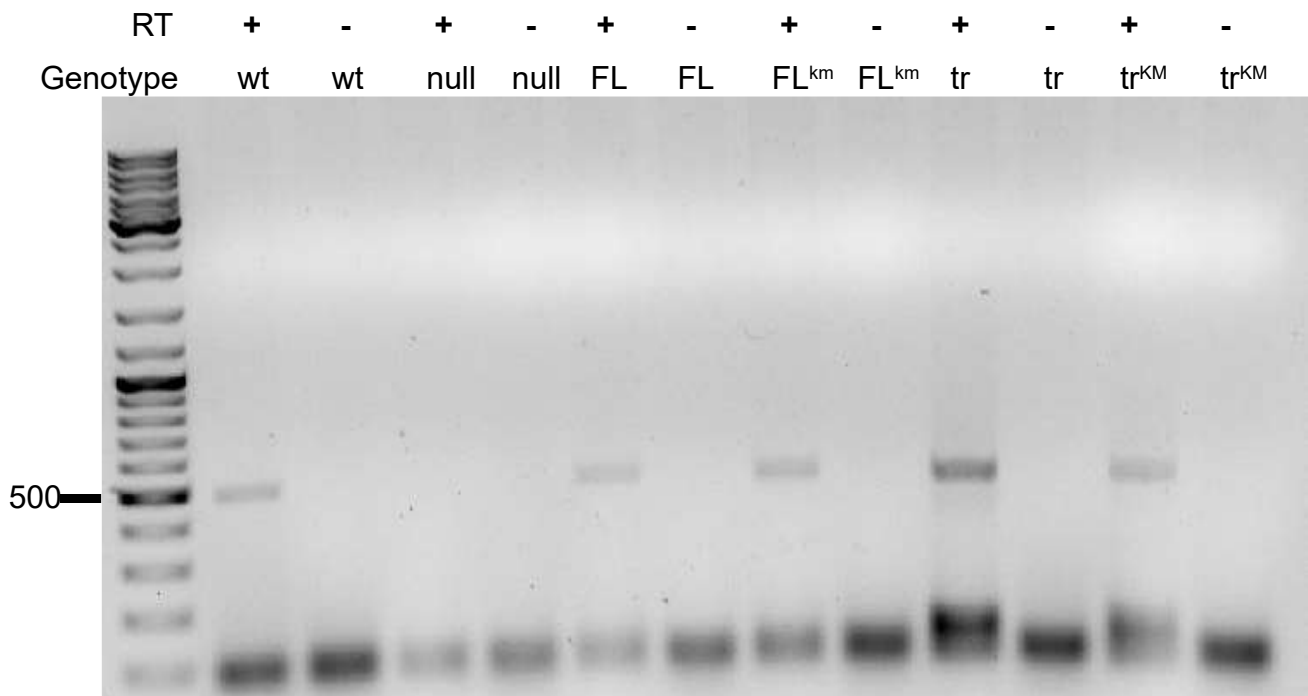

**Figure S1-** RT reaction for *Fancm* transgenic flies- RT PCR was performed as described in material and methods from whole fly genomic preps. RT was either added (+) or omitted (-), to determine if the presence of a band was the result of genomic contamination. Genotypes represented here are Wildtype (wt) from *yw*<sup>1118</sup>; *Fancm*<sup>0693</sup>/*Fancm*<sup>del</sup> (null); *Fancm*<sup>0693</sup>/*Fancm*<sup>del</sup> *Sb w*<sup>+</sup>*Fancm*<sup>FL</sup> (FL); *Fancm*<sup>0693</sup>/*Fancm*<sup>del</sup> *Sb w*<sup>+</sup>*Fancm*<sup>FLKM</sup>; *Fancm*<sup>0693</sup>/*Fancm*<sup>del</sup> *Sb w*<sup>+</sup>*Fancm*<sup>tr</sup> (tr); *Fancm*<sup>0693</sup>/*Fancm*<sup>del</sup> *Sb w*<sup>+</sup>*Fancm*<sup>trKM</sup> (tr<sup>KM</sup>);
