# Supplementary material for: Biochemical Activities and Genetic Functions of the Drosophila melanogaster Fancm Helicase in DNA Repair
Source: Oxford University Press journal article supplement (doi:10.1534/genetics.116.192534), 2016-07-28
Supplement: figures2.pdf [file figures2.pdf]

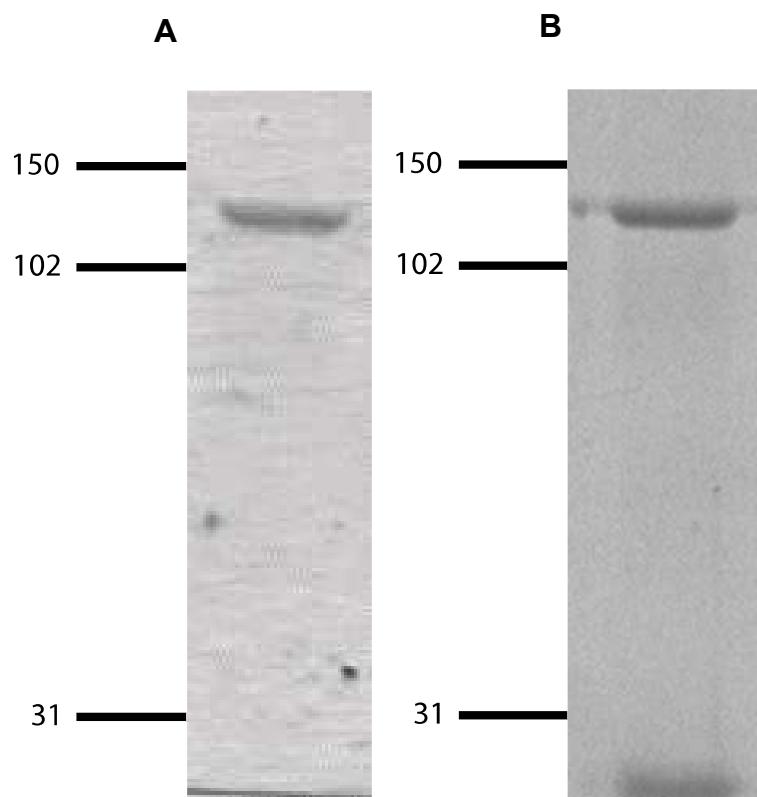

**Figure S2**- Purification of Fancm $\Delta$  and Fancm $\Delta^{KM}$ - Fancm $\Delta$  and Fancm $\Delta^{KM}$  were purified as described in "Materials and Methods". A.) Fancm $\Delta$ ; B.) Fancm $\Delta^{KM}$ . 100 ng were loaded for each protein.
