# Supplementary material for: Biochemical Activities and Genetic Functions of the Drosophila melanogaster Fancm Helicase in DNA Repair
Source: Oxford University Press journal article supplement (doi:10.1534/genetics.116.192534), 2016-07-28
Supplement: figures3.pdf [file figures3.pdf]

**A** ATP hydrolysis as a function of temperature **B** ATP hydrolysis as a function of time

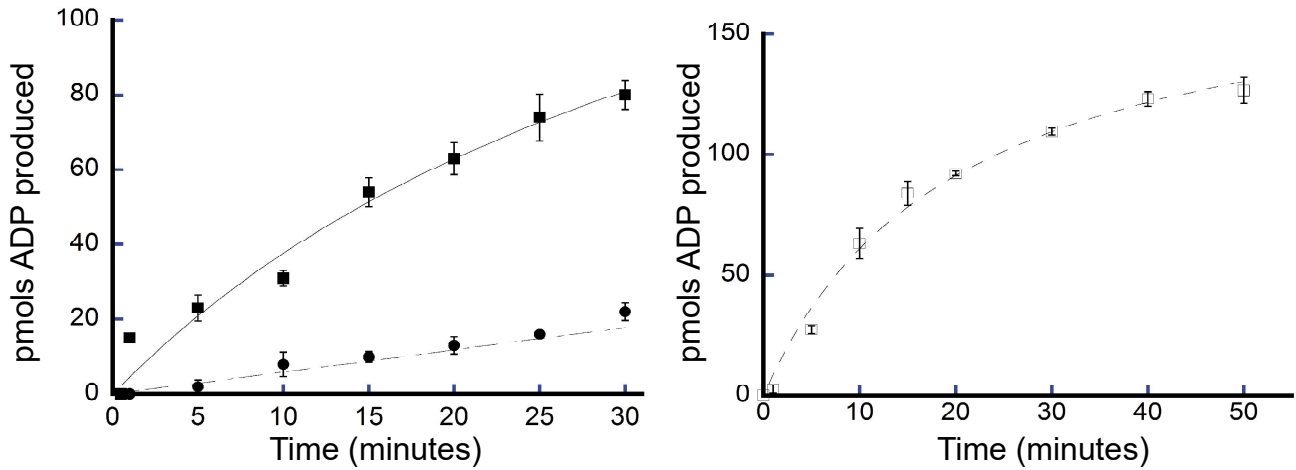

**C** ATP hydrolysis as a function of [NaCl]

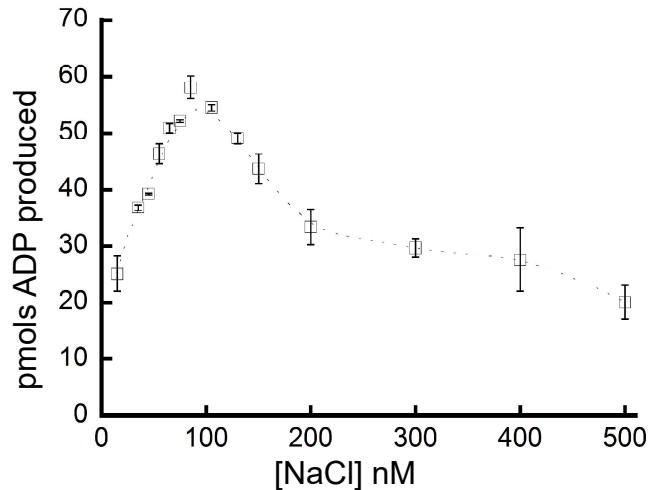

**Figure S3-** ATP hydrolysis by Fancm. A.) ATP hydrolysis by Fancm as a function of temperature. Fancm ATPase activity was examined as a function of temperature using 212 nM Fancm $\Delta$  and M13mp18 ssDNA as the DNA co-factor. All reactions were incubated at 37° (■) or 25° (●) for the time indicated. B.) ATP hydrolysis by Fancm as a function of time. Fancm ATPase activity was examined as a function of time using 212 nM Fancm $\Delta$  and M13mp18 ssDNA as the DNA co-factor. All reactions were incubated at 37° for the time indicated. C.) ATP hydrolysis by Fancm as a function of NaCl concentration (nM). Fancm ATPase activity was examined as a function of salt concentration using 212 nM Fancm $\Delta$  and M13mp18 ssDNA as the DNA co-factor. All reactions were incubated at 37° for 5 mins. The average values from at least three independent experiments were plotted. Error bars represent standard error about the mean.
