# Supplementary material for: Biochemical Activities and Genetic Functions of the Drosophila melanogaster Fancm Helicase in DNA Repair
Source: Oxford University Press journal article supplement (doi:10.1534/genetics.116.192534), 2016-07-28
Supplement: figures5.pdf [file figures5.pdf]

|                   | 1 | 2        | 3             | 4   | 5 | 6        | 7 | 8        | 9 | 10       | 11 |
|-------------------|---|----------|---------------|-----|---|----------|---|----------|---|----------|----|
| S                 | 0 | $\Delta$ | $\Delta^{KM}$ | MBP | 0 | $\Delta$ | 0 | $\Delta$ | 0 | $\Delta$ |    |
| ATP               | + | +        | +             | +   | + | -        | - | +        | + | -        | -  |
| AMP-PNP           | - | -        | -             | -   | - | +        | + | -        | - | -        | -  |
| MgCl <sub>2</sub> | + | +        | +             | +   | + | +        | + | -        | - | +        | +  |

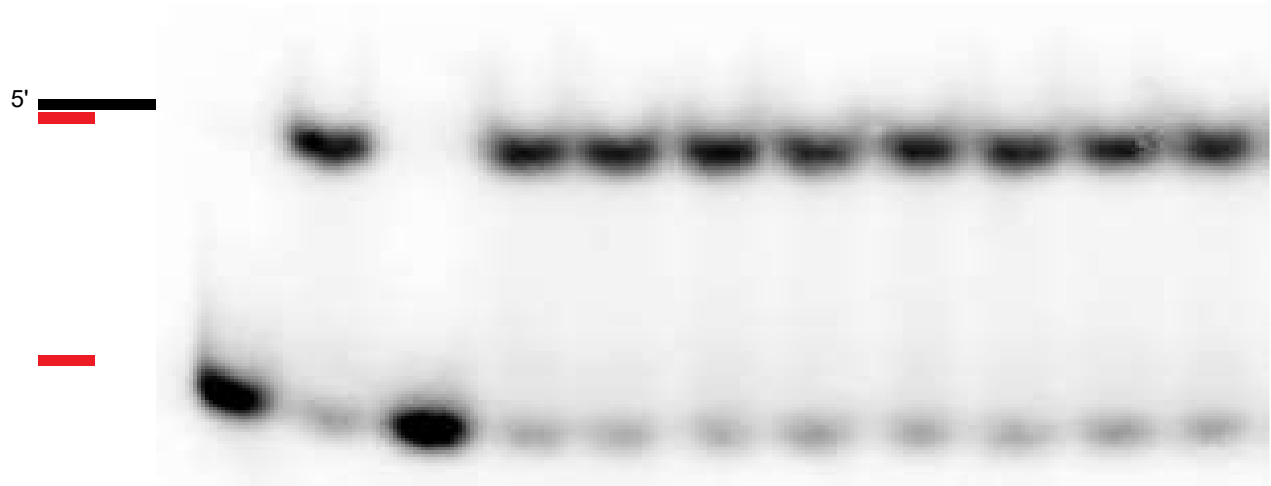

**Figure S5-** Fancm unwinds duplex DNA in an ATP dependent manner. Protein (212 nM) was incubated with a 5' radiolabeled 15 bp partial duplex with a 25 nucleotide 3' overhang (15/40). Lane 1 is a boiled loading control indicating ssDNA (S); Lanes 2, 6, 8, and 10 are no protein controls (0); Lanes 3, 7, 9, and 11, are Fancm $\Delta$  ( $\Delta$ ); Lane 4 is Fancm $\Delta$ KM ( $\Delta$ KM); Lane 5, maltose binding protein (MBP) was used a negative control. Reactions were performed at 37° for 15 minutes in the presence (+) or absence (-) of ATP, AMP-PNP, and MgCl<sub>2</sub>. Colored strand represents radiolabeled strand. Substrate oligonucleotides can be found in Supporting Table S1.
