# Supplementary material for: Biochemical Activities and Genetic Functions of the Drosophila melanogaster Fancm Helicase in DNA Repair
Source: Oxford University Press journal article supplement (doi:10.1534/genetics.116.192534), 2016-07-28
Supplement: figures6.pdf [file figures6.pdf]

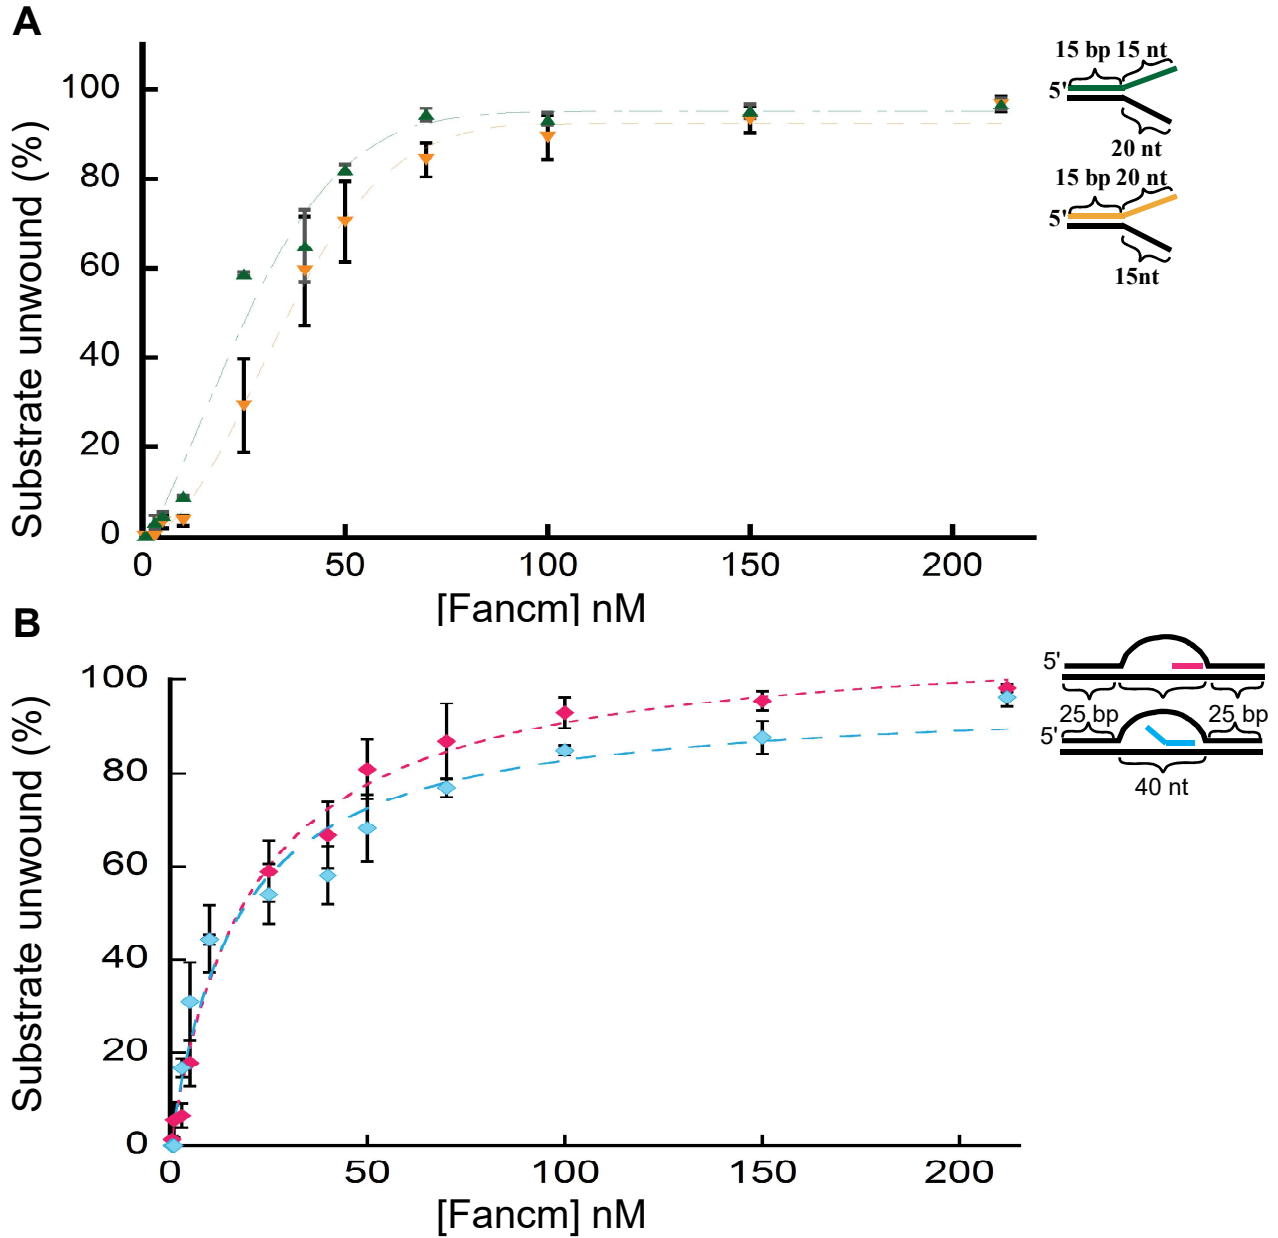

**Figure S6-** Unwinding of DNA substrates by Fancm. Helicase reactions were performed as described under “Materials and Methods”. The indicated concentrations of Fancm were incubated with 0.1 nM of the indicated substrate. Colored strand on each substrate represents radiolabeled 5’ strand. Quantitative data from at least 3 experiments were plotted as the average for each protein concentration. Error bars represent the standard error about the mean. Oligonucleotides used to make these substrates can be found in Supporting Table S1. A.) Unwinding of splayed arms by Fancm ▼ 15 bp duplex region with 25 nt single stranded 3’ arm and a 15 nt single stranded 5’ arm (SAL/40); ▲ 15 bp duplex region with 15 nt single stranded 3’ arm and a 20 nt single stranded 5’ arm (SAS/40). B.) Unwinding of D-loop intermediate substrates by Fancm. Bubble structures were made using a two 90 nt oligonucleotides with 25 bp of complementary ends with a 40 nt non-complementary middle. ◆ End; ♦ End with a 15 nt 5’ -ssDNA tail.
